# Supplementary material
Source: PubMed Central journal article supplement (PMC10659878)
Supplement: media-1.pdf [file media-1.pdf]

I-2

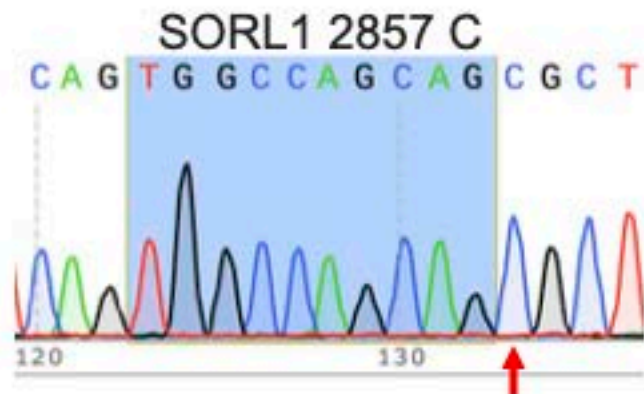

II-2

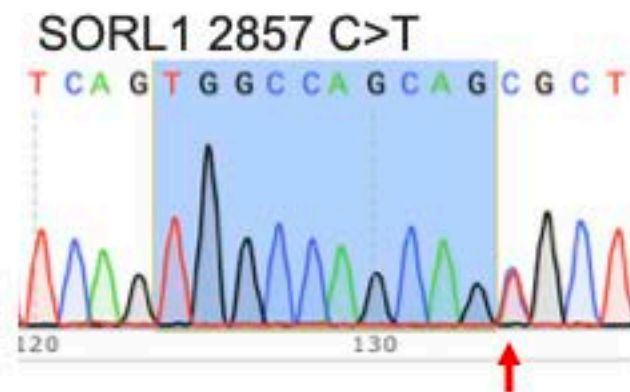

II-3

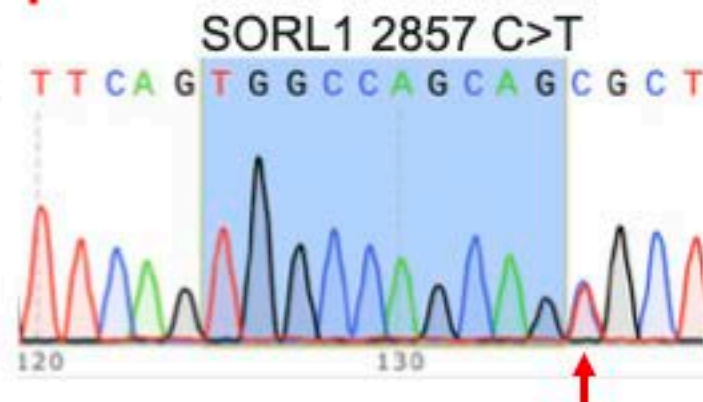

III-6

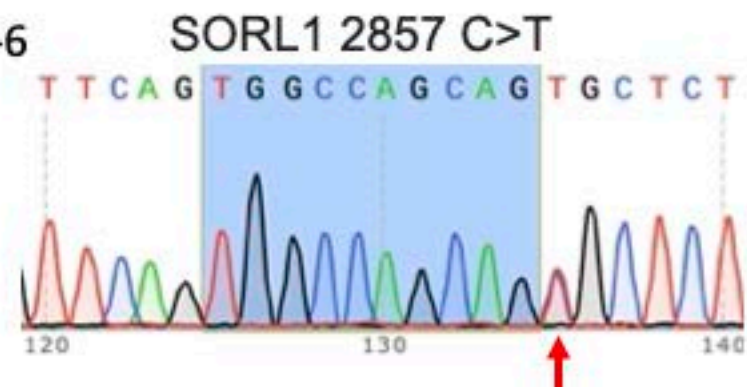

**Supplemental Figure 1.** Sanger sequencing results for I-2, II-2, II-3, III-6. I-2 is C/C at *SORL1* 2857. II-2, II-3, III-6 are C/T at *SORL1* 2857.
